1           **Assessment of Operant Learning and Memory in Mice Born**  
2                           **through Intracytoplasmic Sperm Injection**

3  
4           M. Lewon<sup>1, †</sup>, Y. Wang<sup>2, †</sup>, C. Peters<sup>1</sup>, M. Peterson<sup>1</sup>, H. Zheng<sup>2</sup>, L. Hayes<sup>1,\*</sup> and W. Yan<sup>2, 3,\*,#</sup>

5  
6                           <sup>1</sup>University of Nevada, Reno, Department of Psychology

7           <sup>2</sup>University of Nevada, Reno School of Medicine, Department of Physiology and Cell Biology

8                           <sup>3</sup>University of Nevada, Reno, Department of Biology

9  
10  
11   †: The authors consider that the first two authors should be regarded as joint First Authors

12  
13   \*: These two authors are considered co-senior authors

14   #: Contact corresponding author

15  
16   ORCID: Matthew Lewon (0000-0001-8409-0426), Christina Peters (0000-0002-4002-2656),  
17   Matthew Peterson (0000-0001-6437-8609), Linda Hayes (0000-0003-0553-3490), Wei Yan  
18   (0000-0001-9569-9026), Huili Zheng (0000-0003-3030-2950), Yue Wang (0000-0001-9849-  
19   0682).

20

21 **Abstract**

22 **Study question:** Are there differences in operant learning and memory between mice born  
23 through intracytoplasmic sperm injection (ICSI) and naturally-conceived control (CTL) mice?

24 **Summary answer:** ICSI females exhibited deficits in acquisition learning relative to CTL  
25 females, whereas ICSI males exhibited deficiency in discrimination learning and memory  
26 relative to CTL males during initial assessments. ICSI and CTL groups exhibited equally poor  
27 long-term retention of learned discrimination and memory performances at old age.

28 **What is known already:** Some human outcome studies have suggested that ICSI might be  
29 associated with an increased risk of certain cognitive disorders, but only one of two behavioral  
30 studies with ICSI mouse models have reported differences between ICSI and CTL females. No  
31 studies to date have investigated associative learning in ICSI mice.

32 **Study design, size, duration:** 36 ICSI mice (18 male, 18 female) and 37 CTL mice (19 male, 18  
33 female) aged 3-6 months were compared in a series of operant learning procedures that assessed  
34 acquisition of a new behavior, discrimination learning, and memory. 16 ICSI mice (9 male, 7  
35 female) and 17 CTL mice (10 males, 7 females) received follow-up discrimination learning and  
36 memory assessments at 12 months of age (six months after the end of initial training) to evaluate  
37 retention and reacquisition of learned performances.

38 **Participants/materials, setting, methods:** Mice received daily operant learning sessions in  
39 experimental chambers in which all stimulus events and the recording of responses were  
40 automated. Food rewards were delivered for responding under different conditions of  
41 reinforcement, which varied by procedure. Subjects received a successive series of sessions of  
42 nose poke acquisition training, discrimination training, and the delayed non-matching-to-position  
43 (DNTMP) memory procedure. Mixed repeated measures ANOVAs in which the between-

44 subjects factor was group (ICSI vs. CTL) and the within-subjects factor was repeated exposures  
45 to learning procedures (i.e., sessions) were used to analyze data.

46 **Main results and the role of chance:** In comparisons between all mice (i.e., males and females  
47 combined), CTL mice exhibited superior performance relative to ICSI in response acquisition ( $p$   
48 = 0.03), discrimination ( $p = 0.001$ ), and memory ( $p = 0.007$ ). Sex-specific comparisons between  
49 the groups yielded evidence of sexual dimorphism. ICSI females exhibited a deficit in  
50 acquisition learning relative to CTL females ( $p < 0.001$ ) but there was not a significant difference  
51 between CTL and ICSI males. In the discrimination and memory tasks, ICSI males exhibited  
52 deficits relative to CTL males ( $p = 0.002$  and  $p = 0.02$ , respectively) but the differences between  
53 females in these tasks were not significant. There was no difference in discrimination or memory  
54 retention/re-acquisition assessments conducted with mice at 12 months of age. ICSI males and  
55 females weighed significantly more than CTL counterparts at all points during the experiment.

56 **Limitations, reasons for caution:** The study was not blinded. All learning assessments utilized  
57 food reward; other assessments of operant, Pavlovian, and nonassociative learning are needed to  
58 fully characterize learning in ICSI mice and speculate regarding the implications for cognitive  
59 function in humans conceived via ICSI.

60 **Wider implications of the findings:** Studying learning and memory processes in mouse models  
61 has the potential to shed light on ICSI outcomes at the level of cognitive function. Future  
62 research should use multiple learning paradigms, assess both males and females, and investigate  
63 the effects of variables related to the ICSI procedure. Studying cognitive function in ICSI is an  
64 interdisciplinary endeavor and requires coordination between researchers at the genetic and  
65 psychological levels of analysis.

66 **Study funding/competing interest(s):** This work was supported, in part, by grants from NIH  
67 (P30GM110767, HD071736 and HD085506 to WY), the Templeton Foundation (Grant ID:  
68 61174 to WY), and a New Scholarly Endeavor Grant from the University of Nevada, Reno  
69 Office of Research and Innovation (to ML, YW, HZ, LH, and WY). The authors declare no  
70 competing interests.

71

72 **Keywords:** intracytoplasmic sperm injection, assisted reproductive technology, operant learning,  
73 associative learning, behavior, mouse models, interdisciplinary research

74 **Introduction**

75 Intracytoplasmic sperm injection (ICSI) is an assisted reproductive technology (ART)  
76 that is achieved through the injection of a single spermatozoon directly into the cytoplasm of an  
77 oocyte. ICSI has proven to be effective in treating severe forms of male factor infertility that are  
78 difficult to treat with other ARTs. Since the first ICSI pregnancies in 1992 (Palermo et al., 1992),  
79 the procedure has grown in popularity and is now the most commonly used ART worldwide  
80 (Rozenwaks & Pereira, 2017). In the United States, ICSI use increased from 36.4% of all fertility  
81 treatment cycles in 1996 to 76.2% in 2012 (Boulet et al., 2015). Although ICSI was originally  
82 developed specifically to treat infertility related to semen quality, the use of ICSI for non-male  
83 factor infertility has also increased from 15.4% in 1996 to 66.9% in 2012 (Boulet et al., 2015).

84 The use of ICSI as the treatment of choice for various types of infertility has raised  
85 concerns regarding its overuse, especially in light of the possibility of adverse postnatal  
86 outcomes (Esteves et al., 2018). ICSI has been responsible for over two million births since its  
87 inception (Palermo et al., 2017). As the earliest ICSI babies are now reaching maturity,  
88 researchers have become increasingly concerned with examining ICSI outcomes in various  
89 domains. Human outcome studies inherently contain many confounds and biases and therefore  
90 must be interpreted with caution (Fauser et al., 2014; Pereira et al., 2017). Nevertheless, some  
91 studies have found that ICSI may be associated with increased risks of chromosomal and  
92 epigenetic irregularities (Manipalviratn et al., 2009; Odom & Segars, 2010), congenital birth  
93 defects (Lacamara et al, 2017; Massaro et al., 2015; Pandey et al., 2012), and cognitive disorders  
94 (Hansen et al., 2018; Sandin et al., 2013).

95 While some studies have suggested a tentative relationship between ICSI and abnormal  
96 psychological development, it is particularly difficult to draw conclusions regarding this

97 relationship from human outcome studies because cognitive development is profoundly  
98 influenced by individuals' environmental circumstances (Hart & Risley, 1995; Novak & Peláez,  
99 2004). The heterogeneity of the cultural, familial, and educational environments of children  
100 conceived *via* ICSI makes it impossible to extricate the respective contributions of  
101 genetic/epigenetic and environmental variables on psychological development. Characterizing  
102 the relationship between ICSI and psychological function would ideally involve studying  
103 learning and cognitive development in individuals conceived *via* ICSI in well-controlled  
104 environments.

105         This approach is not feasible with humans, but animal models provide an opportunity to  
106 control for many environmental factors and study behavior and learning processes that serve as a  
107 common basis for cognitive function in humans and nonhumans alike. We were able to identify  
108 only two studies that compared ICSI mice to naturally-conceived control (CTL) mice for this  
109 purpose. Fernández-Gonzalez et al. (2008) compared ICSI and CTL CD-1 male and female mice  
110 in a series of behavioral assays that included an open field test to assess locomotion, an elevated  
111 plus maze task to assess sensitivity to anxiety-inducing stimuli, and a free-choice y-maze task to  
112 assess habituation to novelty. They found no differences between ICSI and CTL males in any of  
113 the procedures, but ICSI females exhibited less exploration in the open field, increased anxiety as  
114 measured by time spent in the open arms of the elevated plus maze, and less habituation as  
115 measured by time spent in a previously explored arm of the y-maze. Kohda et al. (2011) found  
116 no significant differences between male ICSI and CTL C57BL/6 x DBA/2 (BDF1) mice in a  
117 series of tests designed to assess locomotion and sensitivity to fear- and pain-inducing stimuli.  
118 Female mice were not assessed in the latter study.

119           The procedures used in the studies cited above allowed for comparisons between ICSI  
120 and CTL mice in terms of a) general activity/locomotion, b) sensitivity to anxiety- and pain-  
121 inducing aversive stimuli, and c) habituation to novel environmental stimuli. All of these may  
122 provide important information relevant to psychological function, but only the procedures that  
123 measured habituation (Fernández-Gonzalez et al., 2008) may be considered to assess *learning*  
124 per se. Learning is defined generally as changes in organisms' behavior with respect to particular  
125 environmental events or stimuli as a result of previous experiences (Pierce & Cheney, 2013).  
126 Habituation is one of the most basic learning processes and describes situations in which an  
127 animal's response to a particular environmental stimulus or event decreases with repeated  
128 exposure to that stimulus or event (Groves & Thompson, 1970; Rankin et al., 2009; Thompson &  
129 Spencer, 1966). Habituation is categorized as an example of *nonassociative learning* because  
130 changes in behavior occur simply through exposure to an environmental stimulus (Domjan,  
131 2015).

132           *Associative learning* is a higher form of learning and serves as the basis for cognition in  
133 all organisms, including humans (Domjan, 2015; Ginsburg & Jablonka, 2010; Mackintosh,  
134 1974). There are two fundamental associative learning processes that have been studied  
135 extensively with both humans and nonhumans since the early 1900s: Pavlovian learning  
136 (Domjan, 2005; Pavlov, 1927/1960; Rescorla, 1988) and operant learning (Pierce & Cheney,  
137 2013; Skinner, 1938, 1953; Thorndike, 1911). In Pavlovian learning, organisms learn about  
138 relations between environmental stimuli. If two stimuli frequently occur together in organisms'  
139 environments, they come to respond to the two stimuli in a similar fashion. This allows  
140 organisms to prepare for and more effectively interact with biologically important stimuli  
141 (Domjan, 2005). In operant learning, organisms learn about relations between their behavior and

142 its effects on the environment. Responses that regularly produce rewarding consequences (e.g.,  
143 the opportunity to eat food, drink water, or escape from aversive stimuli) will come to occur  
144 more frequently in the environmental settings where they have been associated with these  
145 consequences. Responses that do not produce rewarding consequences, or result in exposure to  
146 aversive events, come to occur less frequently. Pavlovian and operant learning allow organisms  
147 to interact with their environments effectively and adapt to changes in the environment that occur  
148 during their lifetimes. These learning processes serve as the basis for language and other forms  
149 of complex human behavior (De Houwer et al., 2016; Jablonka & Lamb, 2014; Sturdy &  
150 Nicoladis, 2017).

151 To date, there have been no studies that compared associative learning between ICSI and  
152 CTL mice. Studying these fundamental learning processes has the potential to provide insights  
153 into relationships between ICSI and cognitive function that may not be obtained from human  
154 outcome studies. The purpose of the present study was to conduct the first assessment of operant  
155 learning and memory in a mouse model of ICSI. ICSI and naturally-conceived CTL mice were  
156 exposed to a series of operant learning procedures that assessed acquisition of a new behavior,  
157 discrimination learning, and memory. These assessments were conducted while the mice were  
158 between 3-6 months of age. Follow-up assessments were then conducted with some of the mice  
159 to investigate retention and re-acquisition of learned performances when the mice were 12  
160 months of age.

161

162

## Methods and Materials

163

### Naturally-Conceived Control (CTL) Mice



164 All animal work was performed following the protocol approved by the Institutional  
165 Animal Care and Use Committee (IACUC) of the University of Nevada, Reno. Adult (6-8 weeks  
166 of age) CD-1 mice used in this study were purchased from Charles River, and housed under  
167 pathogen-free conditions in a temperature- and humidity- controlled animal facility at the  
168 University of Nevada, Reno. Natural mating was set up by placing one adult male into a cage  
169 with one adult female, and all of the naturally-conceived control (CTL) mice used in this study  
170 were those from the first 4 litters of four breeding pairs. Pups were weaned at 3 weeks after birth.

171

### 172 **Intracytoplasmic Sperm Injection (ICSI) Mice**

173 Adult female CD-1 mice at 6-12 weeks of age with body weight ranging between 25-45  
174 grams were used as either egg donors or recipients/surrogates. These female mice were  
175 superovulated by intraperitoneal injection of 7 IU of Pregnant Mare's Serum Gonadotropin  
176 (PMSG), followed by intraperitoneal injection of 7 IU of human Chorionic Gonadotropin (hCG)  
177 48 h later. Mature oocytes (MII stage) were collected from the oviducts 14-16 h after hCG  
178 injection, and freed from cumulus cells by treatment with 1.5mg/ml bovine testicular  
179 hyaluronidase (Sigma, Cat# H3506) in the M2 medium (Millipore, Cat# MR-015-D) at 37°C for  
180 2 min. The cumulus-free oocytes were washed and kept in the KSOM+AA medium (Millipore,  
181 Cat#MR-121-D) in an incubator (Sanyo, Cat# 19AIC) at 37°C with air containing 5% CO<sub>2</sub>  
182 before ICSI.

183 ICSI was performed as described previously (Stein and Schultz 2010; Yuan, et al. 2015),  
184 with minor modifications. In brief, WT cauda epididymal sperm were collected into 1 ml HTF  
185 medium (Millipore, Cat# MR-070-D), followed by incubation for ~30 min at 37°C in an  
186 incubator with humidified air containing 5% CO<sub>2</sub>, allowing spermatozoa to swim into the

187 medium. The top 100  $\mu$ l sperm suspension was sonicated at the medium level for five times with  
188 3 seconds each (Bioruptor UCD-200; Diagenode). An aliquot of 2  $\mu$ l sperm HTF suspension was  
189 mixed immediately with 50  $\mu$ l of 4% PVP (Sigma, Cat# P5288) in water (Millipore, Cat# TMS-  
190 006-C). A single sperm head was picked up and injected into the mature oocytes using a glass  
191 pipette equipped with a piezo drill under the control of an electric micromanipulator  
192 (TransferMan NK2, Eppendorf). Injection of  $\sim$ 20 oocytes was completed within 20 minutes at  
193 room temperature. Sperm sonication was then repeated to obtain freshly prepared sperm heads  
194 for injection. Injected oocytes were transferred to the KSOM+AA medium (Millipore, Cat#  
195 MR-121-D) covered by mineral oil and cultured in an incubator at 37°C with humidified air  
196 containing 5% CO<sub>2</sub>. Between 4-6 h post ICSI, 18-26 2PN stage embryos were transferred into  
197 the oviducts of pseudo-pregnant CD-1 females (8-16 weeks of age) that had been mated during  
198 the prior night with vasectomized adult CD-1 males (10-16 weeks of age).

199

## 200 **Subjects**

201 36 ICSI (18 males and 18 females) and 37 naturally-conceived CTL mice (19 males and  
202 18 females) obtained as described above served as the subjects. All the mice were between 12-13  
203 weeks of age at the beginning of the training described below.

204

## 205 **Housing**

206 ICSI and CTL mice were housed separately in clear plastic Tecniplast® home cages in  
207 same-sex groups of three to five mice per cage. Cages were equipped with absorbent corn cob  
208 bedding and items for enrichment including cotton fiber nestlets, a transparent red polycarbonate  
209 mouse hut and wooden gnawing sticks. Cages were housed in a temperature- and humidity-

210 controlled colony room with a 12:12 light/dark cycle with lights on at 7:00. Except for the  
211 scheduled deprivations, subjects had free access to laboratory chow (Harlan Teklad) in overhead  
212 feeders. Subjects had free access to purified drinking water at all times.

213

### 214 **Food Deprivation**

215 In order to establish motivation for the sucrose pellet rewards used in experimental  
216 sessions, subjects were deprived of food 14 h prior to daily experimental sessions. Food was  
217 removed from the subjects' cages daily at 19:00. Mice had free access to water during the food  
218 deprivation period. Experimental sessions were conducted daily at 9:00, and food was returned  
219 to the cages after all mice had completed their training sessions. They then had free access to  
220 food and water until the next deprivation period.

221

### 222 **Handling and Weighing**

223 Mice were handled using 15 cm tall x 5.75 cm diameter clear plastic tubes open on one  
224 end and wide enough to allow the subjects to move freely while sitting in the bottom. Handling  
225 tubes have been shown to reduce inter-handler variability and handler-induced stress (Hurst &  
226 West, 2010). Prior to each session, a mouse was guided into the tube, weighed, and then placed  
227 in the experimental apparatus. When the session concluded, the mouse was transported back to  
228 its home cage in the tube.

229

### 230 **Apparatus**

231 All learning and memory assessments were conducted in Med Associates® (St. Albans,  
232 VT) modular operant test chambers (ENV-307A). The inside dimensions of the chambers were

233 12.7 cm high x 15.9 cm wide x 14.0 cm deep. Side walls were composed of transparent  
234 polycarbonate, and the front and back walls were composed of three modular columns of  
235 aluminum panels. Each chamber was housed in a sound attenuating cabinet with a ventilation fan  
236 to mask ambient noise. A 100 mA house light (ENV-315M) was mounted in the center column  
237 of the back wall of the chambers 10 cm above the grid floor. On the front wall of the chambers,  
238 opposite of the house light, a receptacle measuring 3.8 cm high x 8.9 cm wide was mounted in  
239 the center column 0.5 cm above the grid floor. The receptacle was capable of receiving 20 mg  
240 Bio-Serv sucrose reward pellets delivered via a pedestal mount pellet dispenser (ENV-203M-20).  
241 Two illuminable nose poke operanda (ENV-313M) were mounted 3 cm to either side of the  
242 receptacle. The access port for each nose poke measured 1.3 cm in diameter x 1 cm deep. Entry  
243 of a subjects' nose at least 0.64 cm into the access port broke a photobeam and defined a  
244 response. The presentation and recording of all experimental events were controlled via MED-  
245 PC IV (Med Associates) software.

246

### 247 **Magazine Training**

248 Prior to the learning and memory assessments described below, magazine training was  
249 provided to teach the subjects to approach the food receptacle and eat when reward pellets were  
250 delivered. Subjects were 12-13 weeks of age at the onset of this training and were deprived of  
251 food prior to all sessions as described above. Once an animal was placed inside the chamber, a  
252 single pellet was delivered when the animal was oriented toward the receptacle but did not have  
253 its head inside of it. After the animal approached and ate the pellet, another pellet was delivered  
254 in the same manner. A session was terminated when a mouse had consumed seven pellets. The  
255 latency between the delivery of a pellet and its consumption was recorded for each pellet. Each

256 mouse received two such sessions per day for five consecutive days (10 total sessions). By the  
257 end of this training, all subjects reliably approached the receptacle and consumed pellets when  
258 they were delivered.

259

## 260 **Learning and Memory Assessments**

261 Subjects were exposed to four operant learning and memory assessments conducted in  
262 succession. These procedures were the same as those described in Lewon et al. (2017). Each  
263 successive assessment was designed to evaluate an increasingly complex performance. These are  
264 described below.

265

### 266 **Nose Poke Acquisition**

267 The first assessment was designed to evaluate the acquisition of a new response through  
268 reinforcement. Reinforcement describes a fundamental learning process whereby the frequency  
269 of a behavior increases because it has been followed by a rewarding consequence (Domjan,  
270 2015). In the present study, the behavior to be acquired was nose poking (i.e., insertion of the  
271 nose at least 0.64 cm into the portal of the nose poke operanda) and the rewarding consequence  
272 was the delivery of a sugar pellet. The frequency with which this behavior increased through  
273 reinforcement and occurred across training sessions provided a measure of acquisition learning.

274 Subjects were 12.5-13.5 weeks of age at the beginning of this assessment. Each session  
275 began with the illumination of the house light and both nose poke stimulus lights. Responses on  
276 either nose poke were immediately followed by the delivery of one sucrose pellet (i.e., a fixed-  
277 ratio 1 schedule of reinforcement). Each session was terminated after 15 minutes. One session  
278 was conducted daily across 10 consecutive days.

279

## 280 **Switching Discrimination Task**

281         The purpose of the second procedure was to assess discrimination learning.

282         Discrimination occurs when organisms learn to engage in a response when the probability of

283         reinforcement is high while abstaining from responding when the probability of reinforcement is

284         low. Discrimination learning tasks may take many forms, but the most common procedure

285         involves rewarding a response when it occurs in one environmental context but withholding

286         reward when the response occurs in a different context. Evidence of discrimination learning is

287         obtained when the response comes to occur more frequently in the setting where it is rewarded

288         and less frequently in settings where it is not. Discrimination learning serves as the basis for

289         many activities that are considered to be cognitive in nature, and abnormalities in this domain are

290         characteristic of a wide range of psychological disorders (Domjan, 2015).

291         We assessed discrimination learning in a series of sessions in which responses that

292         occurred on illuminated nose pokes were rewarded while responses that occurred on

293         unilluminated nose pokes were not. All mice were 14-15 weeks of age at the beginning of this

294         training. Each session began with the illumination of the house light and the start of a trial in

295         which one of the two nose pokes was illuminated (the program arranged it such that there was a

296         0.5 probability of either). Responses on the unilluminated nose poke were recorded but produced

297         no programmed consequences. A response on the illuminated nose poke was rewarded with the

298         immediate delivery of a sugar pellet followed by a 5-s intertrial interval (ITI) before the

299         commencement of the next trial. Because there was a 0.5 probability of either nose poke being

300         illuminated on any given trial, the subjects were required to learn to respond on the illuminated

301 nose poke, regardless of position (thus the name *switching discrimination task*; SDT). Sessions  
302 were terminated after 15 minutes, and one session was conducted daily for 20 consecutive days.

303 Discrimination index (DI) provided a measure of the extent to which this discrimination  
304 performance was learned. DI was calculated by dividing the total number of responses on the  
305 illuminated nose pokes by the total number of responses on the illuminated and unilluminated  
306 nose pokes during a session. As we have noted, evidence of discrimination learning is provided  
307 by higher response frequencies in settings in which responses have been reinforced (i.e.,  
308 illuminated nose pokes) relative to settings in which they have not been reinforced (i.e.,  
309 unilluminated nose pokes). Higher DI values therefore represent greater discrimination learning.

310

### 311 **Delayed Non-Matching-To-Position Memory Task**

312 This task was designed to assess memory. The delayed non-matching-to-position  
313 procedure (DNMTP; Steckler et al., 1998) was chosen because it is held to assess two types of  
314 memory: working memory and reference memory. Memory researchers describe working  
315 memory as information that is retained only long enough to complete a particular task  
316 immediately at hand. Once the task is completed, the information is no longer necessary/relevant.  
317 On the other hand, reference memory refers to the longer-term retention of information that  
318 allows for the successful use of shorter-term working memory in the completion of a task.  
319 According to memory theorists, reference memory provides the context necessary to  
320 appropriately use working memory (Domjan, 2015).

321 The DNMTP procedure proceeded as follows. Each session began with the illumination  
322 of the house light and the start of a trial in which one of the two nose pokes was illuminated (0.5  
323 probability of either). This portion of the trial was called the forced choice portion: mice were

324 required to respond on the illuminated nose poke to proceed to the subsequent portions of the  
325 trial. If they responded on the unilluminated nose poke, there were no programmed  
326 consequences. A response on the illuminated nose poke initiated a 2-s retention interval during  
327 which both nose pokes were dark. Any responses that occurred during this interval produced no  
328 programmed consequences. Following the retention interval, both nose pokes were illuminated  
329 for the free choice portion of the trial, and subjects could respond on either nose poke. Responses  
330 on the same nose poke as required during the forced choice portion of the trial were counted as  
331 incorrect and no reward was delivered. Responses on the opposite nose poke of the forced choice  
332 trial were counted as correct and rewarded with the delivery of a sugar pellet (thus the name *non-*  
333 *matching-to-position*). A trial ended after a correct or incorrect response on the free choice  
334 portion and was followed a 5-s ITI. After the ITI, the next trial began with another forced choice.  
335 Sessions were terminated when an animal completed 20 trials or 30 minutes, whichever occurred  
336 first. Subjects were 17-18 weeks of age at the beginning of this training and received one session  
337 daily for 30 consecutive days.

338         In order to obtain rewards in a trial, mice were required to respond on the nose poke that  
339 was not the one on which they responded in the forced choice portion. The working memory  
340 aspect of this performance was that the mice had to remember where they had responded in the  
341 forced choice portion of the trial during the retention interval. The reference memory portion  
342 involved remembering the general rule for reward: respond on the nose poke opposite of the one  
343 on which they responded during the forced choice portion of the trial, whether it occurred on the  
344 left or right nose poke. When the mice did so, they received a sugar pellet reward and the trial  
345 was counted as “correct.” The proportion of correct trials per session provided a measure of  
346 memory performance.



347

### 348 **DNMTP Retention Checks**

349           After the 30 trials of DNMTP training described above, mice were removed from the  
350 training environment for a prescribed period of time before receiving three additional DNMTP  
351 retention check sessions to assess long-term memory of the DNMTP performance. Sessions were  
352 identical to those described above. The first retention check occurred two days after the last  
353 DNMTP training session. The second occurred five days after the first, and the third occurred 10  
354 days after the second. Subjects were between 21-23 weeks of age during the three retention  
355 checks.

356

### 357 **Follow-Up Assessments with Aged Mice**

358           After the initial battery of assessments, follow-up assessments were conducted with some  
359 of the same mice from the initial assessments (CTL n = 17; 10 males, 7 females; ICSI n = 16, 9  
360 males, 7 females) when they were between 52-53 weeks of age (i.e., approximately 30 weeks  
361 after the last DNMTP retention check session). Prior to the follow-up assessments, mice were  
362 weighed for five days under free-feeding conditions starting at 52 weeks of age. After five days,  
363 the food deprivation schedule described above was imposed and assessments commenced. The  
364 follow-up assessments consisted of 15 daily sessions of the switching discrimination task  
365 followed immediately by 15 daily sessions of the DNMTP memory task. All subjects had  
366 previous exposure to these procedures during their initial training, and the follow-up assessments  
367 were therefore designed to test retention and re-acquisition of these performances at old age.

368

### 369 **Statistical Analysis**

370 Mixed repeated measures ANOVAs were used to compare the results for ICSI and CTL  
371 mice in each learning and memory assessment. The between-subjects factor in these analyses  
372 was group (ICSI vs. CTL) and the within-subjects factor was session. Omnibus analyses were  
373 used to compare all ICSI and CTL mice, and these were followed by sex-specific analyses (i.e.,  
374 ICSI vs. CTL males and ICSI vs. CTL females). The analyses tested for main effects of group  
375 and session as well as for a group x session interaction. We used an  $\alpha$  value of 0.05 as the  
376 criterion for significance, and partial-eta squared values ( $\eta^2$ ) are provided as estimates of effect  
377 sizes.

378

379

## Results

### 380 Nose Poke Acquisition

381 The training sessions in this phase of the experiment were designed to assess the  
382 acquisition of a new behavior through reinforcement learning. Figure 1 shows the mean number  
383 of responses per session for all ICSI and CTL subjects of both sexes (top) and separated by ICSI  
384 and CTL males and females (bottom). The top panel shows that subjects in both groups generally  
385 made more responses in each subsequent training session, but the CTL subjects made slightly  
386 more responses in all but one session. The bottom panels show no consistent differences between  
387 ICSI and CTL males, but CTL females consistently made more responses per session than their  
388 ICSI counterparts. This means that the slight overall difference between all ICSI and CTL mice  
389 shown in the top panel of Figure 1 is largely due to rather large and consistent differences in the  
390 number of responses per session between ICSI and CTL females during this procedure.

391

392 The mixed repeated measures ANOVA comparing all ICSI and CTL mice (males and  
females combined) found a large effect for session ( $F_{9, 639} = 44.31, p < 0.001, \eta^2 = 0.38$ ) and

393 smaller effects for group ( $F_{1,71} = 4.93$ ,  $p = 0.03$ ,  $\eta^2 = 0.07$ ) and the group x session interaction  
394 ( $F_{9,639} = 2.06$ ,  $p = 0.03$ ,  $\eta^2 = 0.03$ ). The same analysis was used to compare ICSI and CTL  
395 males and found a large effect for session ( $F_{9,315} = 20.54$ ,  $p < 0.001$ ,  $\eta^2 = 0.37$ ). There was a  
396 barely significant effect for the group x session interaction ( $F_{9,315} = 1.96$ ,  $p = 0.05$ ,  $\eta^2 = 0.05$ ),  
397 but there was no main effect for group. The comparison between ICSI and CTL females found  
398 significant main effects for session ( $F_{9,306} = 28.46$ ,  $p < 0.001$ ,  $\eta^2 = 0.46$ ) and group ( $F_{1,34} =$   
399  $6.98$ ,  $p = 0.01$ ,  $\eta^2 = 0.17$ ) but no significant group x session interaction.

400 To summarize, there was little difference in acquisition between ICSI and CTL males,  
401 but the CTL females acquired nose poke responding more readily than the ICSI females. While  
402 the CTL females consistently made more responses per session than ICSI females, the statistical  
403 analysis did not find a significant group x session interaction. It appeared that CTL females  
404 consistently responded more than ICSI females, but the degree to which responding increased  
405 across sessions was similar for both groups of females.

406

### 407 **Switching Discrimination Task**

408 The switching discrimination task (SDT) assessed discrimination learning. Figure 2  
409 shows the mean discrimination index (DI) for all ICSI and CTL mice (top) and for ICSI/CTL  
410 males and females (bottom) in the SDT procedure. DI increased for all mice across the 20  
411 training sessions. While both groups gradually made fewer unrewarded responses during this  
412 training, the top panel shows that the CTL mice made a greater proportion of rewarded responses  
413 from the third session onward and reached a substantially higher DI by the final session (0.68,  
414 +/- 0.02 SEM for CTL compared to 0.58, +/- 0.02 SEM for ICSI). The graphs in the bottom  
415 panels of Figure 2 show that both male and female CTL mice often had higher DIs than their

416 ICSI counterparts, but the difference between CTL and ICSI discrimination performances was  
417 more pronounced and consistent for males.

418 Statistical analysis for the comparison between all ICSI and CTL mice found a large main  
419 effect for session ( $F_{19, 1349} = 100.63$ ,  $p < 0.001$ ,  $\eta^2 = 0.59$ ) and a main effect for group ( $F_{1, 71} =$   
420  $11.77$ ,  $p = 0.001$ ,  $\eta^2 = 0.14$ ), but no effect for the group x session interaction. Similarly, the  
421 comparison between ICSI and CTL males found significant main effects for session ( $F_{19, 665} =$   
422  $71.16$ ,  $p < 0.001$ ,  $\eta^2 = 0.67$ ) and group ( $F_{1, 35} = 11.10$ ,  $p = 0.02$ ,  $\eta^2 = 0.24$ ) but no group x  
423 session interaction. The comparison between ICSI and CTL females found a significant main  
424 effect for session ( $F_{19, 646} = 35.96$ ,  $p < 0.001$ ,  $\eta^2 = 0.51$ ) but no main effect for group or the  
425 group x session interaction.

426 Taken together, CTL mice exhibited better discrimination learning, and this difference  
427 was more pronounced between CTL and ICSI males than it was between the female groups.  
428 Despite this, statistical analyses did not reveal significant group x session interactions for any of  
429 the comparisons, including the comparison between CTL and ICSI males. Overall, it appeared  
430 that the rate of improvement in DI scores across sessions was similar for the two groups, but the  
431 CTL mice nevertheless had consistently higher DI scores.

432

### 433 **Delayed Non-Matching-to-Position Memory Task**

434 This procedure assessed working and reference memory. Figure 3 shows the mean  
435 proportion of correct/rewarded trials in DNMTM recognition memory sessions for all ICSI and  
436 CTL (top panel) and for ICSI/CTL males and females (bottom panels). The top panel shows that  
437 while the proportion of correct responses made by both groups increased across sessions, the  
438 CTL mice consistently made more correct responses from the seventh session onward. As in the

439 previous SDT procedure, there appeared to be a larger difference in performance between males  
440 than females. CTL males made a greater proportion of correct responses than ICSI males in  
441 every session except the second. On the other hand, CTL and ICSI females made approximately  
442 the same proportion of correct responses until the 11<sup>th</sup> session, after which CTL females made  
443 slightly more correct responses in most sessions.

444 The mixed repeated measures ANOVA comparing all ICSI to CTL found significant  
445 main effects for session ( $F_{29, 2030} = 19.72$ ,  $p < 0.001$ ,  $\eta^2 = 0.22$ ) and group ( $F_{1, 71} = 7.67$ ,  $p =$   
446  $0.007$ ,  $\eta^2 = 0.10$ ) but not for the group x session interaction. The comparison between CTL and  
447 ICSI males similarly found significant effects for session ( $F_{29, 986} = 10.80$ ,  $p < 0.001$ ,  $\eta^2 = 0.24$ )  
448 and group ( $F_{1, 71} = 6.44$ ,  $p = 0.02$ ,  $\eta^2 = 0.16$ ) but not for the group x session interaction. For the  
449 comparison between CTL and ICSI females, there was an effect for session ( $F_{29, 986} = 9.59$ ,  $p <$   
450  $0.001$ ,  $\eta^2 = 0.22$ ) but not for group or the group x session interaction.

451 The results of the DNMTTP memory procedure were similar to those obtained in the  
452 preceding SDT. Specifically, CTL mice performed better than ICSI, and the difference between  
453 CTL and ICSI males was more pronounced than the difference between CTL and ICSI females.  
454 Statistical tests again found significant main effects for the group factor in the comparison  
455 between all ICSI/CTL and between male ICSI/CTL, but there was not a significant group x  
456 session interaction. Thus, it appeared that ICSI and CTL performance improved at  
457 approximately the same rate across training sessions, but the CTL mice (especially the males)  
458 consistently made a greater proportion of correct responses than their ICSI counterparts.

459

460 **DNMTTP Retention Checks**

461 Retention of the DNMTTP performance was assessed with three retention check sessions.  
462 Figure 4 shows the mean proportion of correct responses in the three DNMTTP retention checks  
463 for all ICSI and CTL mice (top) and separated by males and females (bottom). For reference, the  
464 first (leftmost) data point on these figures represents the mean proportion correct for each group  
465 in the last five DNMTTP training sessions (i.e., sessions 25-30). The top panel shows that the  
466 mean proportion correct decreased slightly for both groups in the first (2-day) retention check  
467 relative to the last five sessions of DNMTTP training. For CTL mice, the mean proportion correct  
468 continued to decrease slightly across the remaining two retention checks while the ICSI mice'  
469 performance remained at approximately the same level. The two groups' performances were  
470 equal in the final 10-day retention check. The bottom panels of Figure 4 shows that the  
471 proportion correct decreased monotonically for CTL males and females across the retention  
472 checks. For ICSI males, the proportion correct in the 5-day test increased slightly relative to the  
473 2-day test but decreased to approximately the same level as the CTL males in the 10-day test. For  
474 ICSI females, proportion decreased across the 2- and 5-day tests but increased slightly in the  
475 final test.

476 The mixed ANOVA comparing all ICSI and CTL mice found a significant effect for  
477 session (i.e., significant decreases in proportion correct across the three retention checks;  $F_{2, 140} =$   
478  $6.17$ ,  $p = 0.003$ ,  $\eta^2 = 0.08$ ) but no effects for group or group x session interaction. The  
479 comparisons between ICSI and CTL males and females likewise found significant effects for  
480 session for both ( $F_{2, 68} = 3.17$ ,  $p = 0.05$ ,  $\eta^2 = 0.09$  for males and  $F_{2, 68} = 3.65$ ,  $p = 0.03$ ,  $\eta^2 =$   
481  $0.10$  for females), but found no effects for group or group x session interaction for either. Thus,  
482 while there was a general decrease in proportion correct across the three retention checks, there  
483 was no significant difference between the groups in the rate at which this decrease occurred.

484

### 485 **Follow-Up Assessments with Aged Mice**

486 Follow-up assessments were conducted with aged mice to evaluate long-term retention  
487 and reacquisition of learned performances. Figure 6 shows the results for the SDT and DNMTTP  
488 memory re-training sessions. As can be seen in the left panel, the mean DI for both groups  
489 improved slightly across the 15 SDT sessions and there was a significant effect for session ( $F_{14,}$   
490  $_{434} = 5.96, p < 0.001, \eta p^2 = 0.16$ ). As during the initial SDT training, CTL mice showed better  
491 discrimination performances on average, but there was no significant effect for either group or  
492 group x session interaction. Discrimination improved for both groups across re-training, but  
493 neither group achieved the same level of performance as they had after the initial 15 SDT  
494 training sessions (cf., Figure 2).

495 The right panel of Figure 6 shows performance in the DNMTTP memory reassessments.  
496 The aged mice were unsuccessful in re-learning this performance after 15 sessions. Neither  
497 group approached the levels obtained after the 15 initial DNMTTP sessions (Figure 3), and there  
498 was no discernible improvement beyond chance responding. There was no significant effect for  
499 session, group, or group x session interaction.

500

### 501 **Body Weight**

502 As noted above, mice were weighed immediately prior to all sessions following a 14-h  
503 period of food deprivation. Figure 7 shows the mean daily weights of the ICSI and CTL males  
504 (top) and females (bottom) from the first session of magazine training to the final DNMTTP  
505 retention check. The gaps in the data series during weeks 21-23 were days between retention  
506 checks where mice were not weighed and had continuous free access to food. Across the

507 experiment, ICSI males and females both consistently weighed more than their CTL  
508 counterparts. Both ICSI and CTL males gained weight across the experiment, but ICSI males  
509 gained weight at a greater rate than CTL males. Compared to the males, the females gained  
510 relatively little weight across the experiment. However, both ICSI and CTL females gained a  
511 larger proportion of weight during the retention checks when they had longer periods of access to  
512 food. From the last DNMTTP session to the final retention check, the weights for ICSI and CTL  
513 males increased by 3.94% and 3.42%, respectively. In comparison, ICSI female weights  
514 increased by 10.79% and CTL female weights increased by 7.88% during the same period.

515         Figure 7 displays the mean weights of the mice for five days prior to and during the  
516 reassessment training sessions starting at 52 weeks of age. All mice had *ad libitum* access to food  
517 from the end of the learning and memory initial assessments (when they were approximately six  
518 months of age) to the time of the re-training, when the food deprivation regimen was reinstated.  
519 At the first weighing after six months of free-feeding, ICSI males weighed an average of 62.4 g  
520 (+/- 3.10 SEM) compared to 50.6 g (+/- 2.96 SEM) for CTL males. ICSI females likewise  
521 weighed substantially more than their female CTL counterparts (63.7 g +/- 6.25 SEM for ICSI  
522 compared to 46.3 g +/- 4.67 for CTL).

523         The reinstatement of the food deprivation schedule produced an immediate reduction in  
524 weights of the males, but weights stayed largely the same until the end of the reassessments 30  
525 days later. For females, the food deprivation schedule resulted in progressively lower weights  
526 across this same time, and this was more pronounced for the CTL females.

527

528

## Discussion



529           We subjected ICSI and CTL mice to a series of operant learning procedures to assess  
530 acquisition, discrimination learning, and memory. The inclusion of both males and females  
531 allowed for global comparisons between ICSI and CTL mice as well as for same-sex  
532 comparisons between the groups. Overall, CTL mice were found to outperform their ICSI  
533 counterparts in all but one of the learning and memory tasks we employed during their initial  
534 training, and the differences were largely due to sex-specific differences in performance in the  
535 tasks. Specifically, CTL females performed better during acquisition learning than ICSI females,  
536 but there was no difference in acquisition between ICSI and CTL males. In the SDT and  
537 DNMTTP procedures, CTL males exhibited superior discrimination learning and memory  
538 compared to their ICSI counterparts, but there was not a statistically significant difference  
539 between ICSI and CTL females in these tasks. There were no apparent differences between the  
540 groups in the DNMTTP retention checks designed to assess longer-term memory. Both groups  
541 showed significant decrements in performance in SDT and DNMTTP re-training sessions  
542 conducted at 52 weeks of age.

543           While CTL mice exhibited superior performance in all procedures except the DNMTTP  
544 retention checks during initial training, it is interesting to note that statistical analyses revealed  
545 significant group effects but no significant effects for group x session interactions. This means  
546 that the extent to which performance increased across training sessions was roughly equivalent  
547 for ICSI and CTL in the procedures employed here. Despite similar changes in behavior across  
548 repeated exposures to the learning and memory assessments, CTL mice consistently performed  
549 at a higher level. At this point it is unclear why this was the case. Further research investigating  
550 basic learning processes with these mice will be required to explain this difference.

551           A notable auxiliary finding was the relatively large and consistent difference in weights  
552 between ICSI and CTL mice. ICSI males and females both weighed more than their CTL  
553 counterparts both during initial training when mice were three to six months of age and when  
554 mice were over a year old. Other studies have similarly reported higher weights at birth for ICSI  
555 B6C3F1 males and females relative to CTL (Scott et al., 2010) as well as significantly higher  
556 weights for ICSI CD-1 females relative to CTL females from approximately 15 weeks of age  
557 (Fernández-Gonzalez et al., 2008). These data suggest that further investigations into potential  
558 metabolic differences between ICSI and CTL mice may be warranted.

559           There were limitations of the study that must be acknowledged. First, the study was not  
560 blinded: the technicians who handled the mice before and after their daily sessions were aware of  
561 the groups to which they belonged. Although the training sessions (including the recording of  
562 data) were entirely automated and the technicians' interactions with the mice were limited to  
563 weighing and transporting to and from the experimental chamber in handling tubes, blinding  
564 would add an additional level of rigor and control for any inadvertent differences in how mice  
565 were handled. A second limitation is that the procedures were conducted in succession, meaning  
566 that each individual assessment occurred when the mice were at a single age. It may be the case  
567 that comparing acquisition, discrimination, or memory between ICSI and CTL mice at different  
568 points in the developmental timeline may yield different results. As a proof of concept study, we  
569 aimed to show the potential effects of the overall ICSI procedure on the health of offspring; thus,  
570 we did not distinguish multiple factors involved in ICSI, e.g., superovulation protocol, sperm  
571 preparation protocol, culture conditions, injection conditions, stages for embryo transfer, and the  
572 age of surrogate mothers. These variables may be worth testing in future studies.

573           Despite these limitations, the present study strongly suggests that studying learning and  
574 memory in animal models has the potential to shed light on outcomes of ICSI at the level of  
575 cognitive function. Our data open up a number of avenues for further investigation. In this  
576 study, we investigated operant learning and memory using only reinforcement procedures in  
577 which sugar pellets served as the reward. Studies have shown that mouse models that exhibit  
578 learning deficits relative to control mice in one type of operant procedure may exhibit superior  
579 performance in a different operant learning paradigm (Lewon et al., 2017). It is therefore  
580 necessary to expose mouse models to as many types of learning situations as possible to obtain  
581 the fullest picture of cognitive function. Operant learning assessments are diverse and include  
582 procedures that use other types of rewards under different schedules of reinforcement, different  
583 types of spatial and multisensory discrimination and memory tasks, escape/avoidance learning  
584 tasks, and procedures that provide measures of sensitivity to stress-inducing aversive events. In  
585 addition to operant learning procedures, future studies may also examine more basic processes  
586 such as nonassociative and Pavlovian learning. One benefit of the modular experimental  
587 chambers such as those used in this experiment is that a single apparatus may be readily  
588 modified to accommodate all of these types of assessments. As there appeared to be sex-specific  
589 differences in learning and memory in this experiment and studies have similarly found evidence  
590 of sexual dimorphism in other measures of ICSI outcomes (Esteves et al, 2018; Fernández-  
591 Gonzalez et al., 2008), this research should include assessments of both males and females  
592 (Shansky, 2019).

593           In addition to studying ICSI mice with other types of learning procedures, future research  
594 may also examine how variables related to the ICSI procedure itself may affect learning and  
595 memory. Some studies have found that ART is associated with an increased occurrence of

596 epimutations and imprinting disorders (de Waal, et al., 2012; Lazaraviciute et al., 2014; Pinborg,  
597 2016), and it is known that ARTs may induce embryonic stress responses that alter gene  
598 expression and exert a number of other epigenetic effects during early development (Ramos-  
599 Ibeas et al., 2018; Szöke et al., 2018). Laboratory procedures related to ICSI (e.g., sperm  
600 extraction and selection methods, sample handling, egg retrieval and culture, etc.) may further  
601 contribute to the likelihood of epigenetic alterations (Esteves et al., 2018; Ghosh et al., 2017;  
602 Palermo et al., 2017). Environmental events occurring during lifetime of individuals are known  
603 to produce modifications in gene expression that affect neurodevelopment and psychological  
604 function across the lifespan (Grigorenko et al., 2016; Guan et al., 2015), and there is evidence  
605 that some of these modifications may be inherited by offspring (Babenko et al., 2015; Chen et  
606 al., 2016; Nestler, 2016; Jablonka & Raz, 2009). For all of these reasons, future research should  
607 investigate how the ICSI procedure and the epigenetic factors associated with it affect cognitive  
608 function, ideally across multiple generations.

609         It is premature to speculate as to the implications of these results to cognitive function  
610 and the psychological development of ICSI humans. Although ICSI mice exhibited certain  
611 learning and memory deficits relative to CTL mice in the testing we employed, cognitive deficits  
612 should not be assumed to be invariably associated with ICSI in humans. There are several  
613 reasons for this. First, as noted above, the assessments conducted here represent a small portion  
614 of the procedures available for investigating learning and memory, and a wider range of these  
615 will be needed to more fully characterize cognitive function in ICSI mice. Second, human  
616 learning environments differ in important ways from mice (Hayes & Delgado, 2007), and  
617 families of ICSI children vary widely in terms of socioeconomic status, education, and access to

618 medical and educational resources for their children. The deficits observed in ICSI mice in this  
619 study may therefore prove to be clinically insignificant in certain social environments.

620       Finally, and perhaps most importantly, cognitive function must be seen as the product of  
621 a complex set of interactions between individuals and their environments throughout the  
622 lifespan. During development, environmental factors interact with genetic materials to determine  
623 the physiological phenotypes of whole individuals. These individuals then interact with their  
624 physical and social environments, which shape their behavior across time through  
625 nonassociative, Pavlovian, and operant learning processes. Different learning environments will  
626 inevitably impart different repertoires, and the physiological characteristics of individuals (e.g.,  
627 brain function, metabolism, sensory abilities, etc.) determine their capacity for learning from  
628 particular types of environmental contingencies. Physiological characteristics that provide  
629 advantages for learning in certain environments may prove to be detrimental in others (Lewon et  
630 al., 2017). For these reasons, studying the relationship between ICSI and cognitive function is a  
631 truly interdisciplinary endeavor that does not fall solely within the domain of either genetics or  
632 psychology (Hayes & Fryling, 2009). Genetic and epigenetic analyses by themselves cannot  
633 explain cognitive development in a directly causal manner, as this depends in large part upon the  
634 types of interactions individuals have with their environments. Similarly, analyses at the  
635 psychological level alone cannot explain differences in learning capacities related to genetic  
636 characteristics. Further interdisciplinary research on basic learning processes with mouse models  
637 has the potential to enhance our understanding of these interactions as they relate to ICSI and  
638 other ARTs. This research will require close coordination between investigators at both the  
639 genetic and psychological levels of analysis.

640

641

### **Acknowledgements**

642

The authors would like to thank John F. Gray, Cole Gansberg, Taylor Chase, Laura

643

Cohen, Kristen Green, Osmar Lopez, Elisabeth Mclean, Haley Mizell, Caitlyn Peal, Keenan

644

Raquel, Tori Sandoval, Emily Spurlock, Melanie Stites, and Jamiika Thomas for technical

645

assistance.

646

### **Role of Authors**

647

ML, YW, CP, and MP contributed to the initial draft of the manuscript, and subsequent

648

edits were made by all authors. ML, YW, CP, HZ, LH, and WY contributed to the conception

649

and design of the study. The ICSI procedure and breeding were conducted by YW and HZ.

650

Learning and memory assessments and data analysis were conducted by ML, CP, and MP.

651

652 **References**

- 653 Babenko O, Kovalchuk I, Metz GAS. Stress-induced perinatal and transgenerational epigenetic  
654 programming of brain development and mental health. *Neuroscience and Biobehavioral*  
655 *Reviews* 2015;**48**:70-91.
- 656 Boulet SL, Mehta A, Kissin DM, Warner L, Kawwass JF, Jamieson DJ. Trends in use of and  
657 reproductive outcomes associated with intracytoplasmic sperm injection. *Journal of the*  
658 *American Medical Association* 2015;**313**:255-263.
- 659 Chen Q, Yan W, Duan E. Epigenetic inheritance of acquired traits through sperm RNAs and  
660 sperm RNA modifications. *Nature Reviews: Genetics* 2016;**17**:733-743.
- 661 De Houwer J, Hughes S, Barnes-Holmes D. Associative learning as higher order cognition:  
662 Learning in human and nonhuman animals from the perspective of propositional theories  
663 and relational frame theory. *Journal of Comparative Psychology* 2016;**130**:215-225.
- 664 de Waal E, Yamazaki Y, Ingale P, Bartolomei MS, Yanagimachi R, McCarrey JR. Gonadotropin  
665 stimulation contributes to an increased incidence of epimutations in ICSI-derived mice.  
666 *Human Molecular Genetics* 2012;**21**:4460-4472.
- 667 Domjan M. Pavlovian conditioning: A functional perspective. *Annual Review of Psychology*  
668 2005;**56**:179-206.
- 669 Domjan M. *The Principles of Learning and Behavior*. 7<sup>th</sup> edn, 2015. Cengage, Stamford, CT.
- 670 Esteves SC, Roque M, Bedoschi G, Haahr T, Humaidin P. Intracytoplasmic sperm injection for  
671 male infertility and consequences for offspring. *Nature Reviews: Urology* 2018;**15**:535-  
672 562.
- 673 Fauser BCJM, Devroey P, Diedrich K, Balaban B, Bonduelle M, Delemarre-van de Waal HA,  
674 Estella C, Ezcurra D, Geraedts JPM, Howles CM et al. Health outcomes of children born

- 675 after IVF/ICSI: A review of current expert opinion and literature. *Reproductive*  
676 *BioMedicine Online* 2014;**28**:162-182.
- 677 Fernández-González R, Moreira PN, Pérez-Crespo M, Sánchez-Martín M, Ramirez MA,  
678 Pericuesta E, Bilbao A, Bermejo-Alvarez P, de Dios Hourcade J, de Fonseca FR et al.  
679 Long-term effects of mouse intracytoplasmic sperm injection with DNA-fragmented  
680 sperm on health and behavior of adult offspring. *Biology of Reproduction* 2008;**78**:761-  
681 772.
- 682 Ghosh J, Coutifaris C, Sapienza C, Mainigi M. Global DNA methylation levels are altered by  
683 modifiable clinical manipulations in assisted reproductive technologies. *Clinical*  
684 *Epigenetics* 2017;**9**:1-10.
- 685 Ginsburg S, Jablonka, E. The evolution of associative learning: A factor in the Cambrian  
686 explosion. *Journal of Theoretical Biology* 2010;**266**:11-20.
- 687 Grigorenko EL, Kornilov SA, Naumova OY. Epigenetic regulation of cognition: A  
688 circumscribed review. *Development and Psychopathology* 2016;**28**:1285-1304.
- 689 Groves PM, Thompson RF. Habituation: A dual-process theory. *Psychological Review*  
690 1970;**77**:419-450.
- 691 Guan J, Xie H, Ding X. The role of epigenetic regulation in learning and memory. *Experimental*  
692 *Neurology* 2015;**268**:30-36.
- 693 Hansen M, Greenop KR, Bourke J, Baynam G, Hart RJ, Leonard, H. Intellectual disability in  
694 children conceived using assisted reproductive technology. *Pediatrics*;**142**:e20181629.
- 695 Hart B, Risley TR. *Meaningful differences in the everyday experience of young American*  
696 *children*. 1995. Brookes, Baltimore, MD.



- 697 Hayes LJ, Delgado D. Invited commentary on animal models in psychiatry: Animal models of  
698 non-conventional human behavior. *Behavior Genetics* 2007;**37**:11-17.
- 699 Hayes LJ, Fryling MJ. Interdisciplinary science in interbehavioral perspective. *Behavior and*  
700 *Social Issues* 2009;**18**:5-9.
- 701 Hurst JL, West RS. Taming anxiety in laboratory mice. *Nature Methods* 2010;**7**:825-828.
- 702 Jablonka E, Lamb MJ, Zeligowski A. *Evolution in four dimensions: Genetic, epigenetic,*  
703 *behavioral, and symbolic variation in the history of life.* Revised edn. 2014. MIT Press,  
704 Cambridge, MA.
- 705 Jablonka E, Raz G. Transgenerational epigenetic inheritance: Prevalence, mechanisms, and  
706 implications for the study of heredity and evolution. *The Quarterly Review of Biology*  
707 2009;**84**:131-176.
- 708 Kimura Y, Yanagimachi R. Intracytoplasmic sperm injection in the mouse. *Biology of*  
709 *Reproduction* 1995;**52**:709-720.
- 710 Kohda, T, Ogonuki N, Inoue K, Furuse T, Kaneda H, Suzuki T, Kaneko-Ishino T, Wakayama T,  
711 Wakana S, Ogura A et al. Intracytoplasmic sperm injection induces transcriptome  
712 perturbation without any transgenerational effect. *Biochemical and Biophysical Research*  
713 *Communications* 2011;**410**:282-288.
- 714 Lacamara C, Ortega C, Villa S, Pommer R, Schwarze JE. Are children born from singleton  
715 pregnancies conceived by ICSI at increased risk for congenital malformations when  
716 compared to children conceived naturally? A systematic review and meta-analysis. *JBRA*  
717 *Assisted Reproduction* 2017;**21**:251-259.
- 718 Lazaraviciute G, Kauser M, Bhattacharya S, Haggarty P, Bhattacharya S. A systematic review  
719 and meta-analysis of DNA methylation levels and imprinting disorders in children

- 720 conceived by IVF/ICSI compared with children conceived spontaneously. *Human*  
721 *Reproduction Update* 2014;**20**:840-852.
- 722 Lewon M, Peters CM, Van Ry PM, Burkin DJ, Hunter KW, Hayes LJ. Evaluation of the  
723 behavioral characteristics of the *mdx* mouse model of Duchenne muscular dystrophy  
724 through operant conditioning procedures. *Behavioural Processes* 2017;**142**:8-20.
- 725 Mackintosh NJ. *The psychology of animal learning*. 1974. Academic Press, London.
- 726 Manipalviratn S, DeCherney A, Segars J. Imprinting disorders and assisted reproductive  
727 technology. *Fertility and Sterility* 2009;**91**:305-315.
- 728 Massaro, PA, MacLellan, DL, Anderson PA, Romao, RL. Does intracytoplasmic sperm injection  
729 pose an increased risk of genitourinary congenital malformations in offspring compared  
730 to in vitro fertilization? *Journal of Urology* 2015;**193**:1837-1842.
- 731 Nestler EJ. Transgenerational epigenetic contributions to stress responses: Fact or fiction? *PLoS*  
732 *Biology* 2016;**14**:1-7.
- 733 Novak G, Peláez M. *Child and adolescent development: A behavioral systems approach*. 2004.  
734 Sage, Thousand Oaks, CA.
- 735 Odom LN, Segars J. Imprinting disorders and assisted reproductive technology. *Current Opinion*  
736 *in Endocrinology, Diabetes and Obesity* 2010;**17**:517-522.
- 737 Palermo G, Joris H, Devroey P, Van Steirteghem AC. Pregnancies after intracytoplasmic sperm  
738 injection of single spermatozoon into an oocyte. *Lancet* 1992;**340**:17-18.
- 739 Palermo GD, O'Neill CL, Chow S, Cheung S, Parrella A, Pereira N, Rosenwaks Z.  
740 Intracytoplasmic sperm injection: State of the art in humans. *Reproduction*,  
741 2017;**154**:F93-F110.

- 742 Pandey S, Shetty A, Hamilton M, Bhattacharya S, Maheshwari A. Obstetric and perinatal  
743 outcomes in singleton pregnancies resulting from IVF/ICSI: A systematic review and  
744 meta-analysis. *Human Reproduction Update* 2012;**18**:485-503.
- 745 Pavlov IP. *Conditioned reflexes: An investigation of the physiological activity of the cerebral*  
746 *cortex*. 1960. Dover, Mineola, New York.
- 747 Pereira N, O'Neill C, Lu V, Rosenwaks Z, Palermo GD. The safety of intracytoplasmic sperm  
748 injection and long-term outcomes. *Reproduction* 2017;**154**:F61-F70.
- 749 Pierce WD, Cheney CD. *Behavior analysis and learning*. 5<sup>th</sup> edn, 2013. Psychology Press, New  
750 York, NY.
- 751 Pinborg A, Loft A, Romundstad LB, Wennerholm U, Söderström-Anttila V, Bergh C, Aittomäki  
752 K. Epigenetics and assisted reproductive technologies. *Acta Obstetrica et Gynecologica*  
753 *Scandinavica* 2016;**95**:10-15.
- 754 Ramos-Ibeas P, Heras S, Gómez-Redondo I, Planells B, Fernández-González R, Pericuesta E,  
755 Laguna-Barraza R, Pérez-Cerezales S, Gutiérrez-Adán A. Embryo responses to stress  
756 induced by assisted reproductive technologies. *Molecular Reproduction and*  
757 *Development* 2019;1-15.
- 758 Rankin CH, Abrams T, Barry RJ, Bhatnagar S, Clayton DF, Colombo J, Coppola G, Geyer MA,  
759 Glanzman DL, Marsland S et al. Habituation revisited: An updated and revised  
760 description of the behavioral characteristics of habituation. *Neurobiology of Learning and*  
761 *Memory* 2009;**92**:135-138.
- 762 Rescorla RA. Pavlovian conditioning: It's not what you think it is. *American Psychologist*  
763 1988;**43**:151-160.

- 764 Rosenwaks Z, Pereira N. The pioneering of intracytoplasmic sperm injection: Historical  
765 perspectives. *Reproduction* 2017;**154**:F71-F77.
- 766 Sandin S, Nygren K, Iliadou A, Hultman CM, Reichenberg A. Autism and mental retardation  
767 among offspring born after in vitro fertilization. *Journal of the American Medical*  
768 *Association* 2013;**310**:75-84.
- 769 Scott KA, Yamazaki Y, Yamamoto M, Lin Y, Melhorn SJ, Krause EG, Woods SC, Yanagimachi  
770 R, Sakai RR, Tamashiro K. Glucose parameters are altered in mouse offspring  
771 produced by assisted reproductive technologies and somatic cell nuclear transfer. *Biology*  
772 *of Reproduction* 2010;**83**:220-227.
- 773 Shansky RM. Are hormones a “female problem” for animal research? *Science* 2019;**364**:825-  
774 826.
- 775 Skinner BF. *The behavior of organisms*. 1938. Appleton-Century-Crofts, New York, NY.
- 776 Skinner BF. *Science and human behavior*. 1953. Macmillan, New York, NY.
- 777 Steckler T, Drinkenburgh WH, Sahgal A, Aggleton, JP. Recognition memory in rats—I.  
778 Concepts and classification. *Progress in Neurobiology* 1998;**54**:289-311.
- 779 Stein P, Schultz RM. ICSI in the mouse. *Methods in Enzymology* 2010;**476**:251-262.
- 780 Sturdy CB, Nicoladis E. How much of language acquisition does operant conditioning explain?  
781 *Frontiers in Psychology* 2017;**31**,1-5.
- 782 Szöke H, Bókkon I, Kapócs G, Vagedes J, Saahs C, Mérey A, Kovács Z. Assisted reproductive  
783 technology: Stress-related epigenetic and neurodevelopmental risk? *Activitas Nervosa*  
784 *Superior* 2018;**60**:95-106.
- 785 Thompson RF, Spencer WA. Habituation: A model phenomenon for the study of neuronal  
786 substrates of behavior. *Psychological Review* 1966;**73**:16-43.

- 787 Thorndike EL. *Animal intelligence: Experimental studies*. 1911. Macmillan, New York, NY.
- 788 Yuan S, Stratton, CJ, Bao, J, Zheng, H, Bhetwal, BP, Yanagimachi, R, Yan W. Spata6 is  
789 required for normal assembly of the sperm connecting piece and tight head-tail  
790 conjunction. *Proceedings of the National Academy of Sciences of the United States of*  
791 *America* 2015;**112**:E430-439.

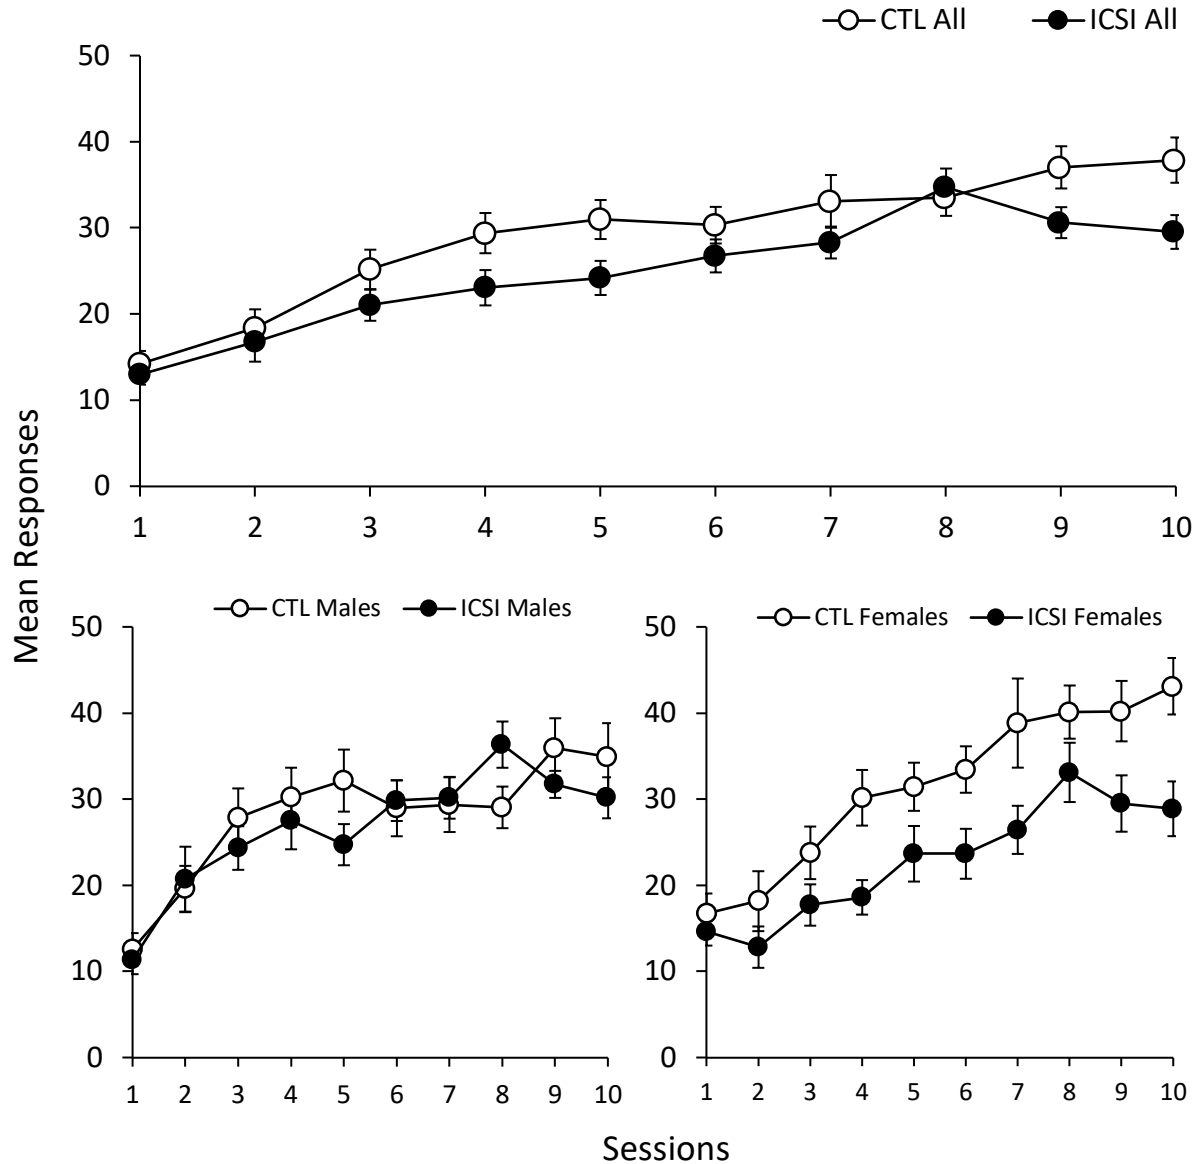

792

793 **Figure 1.** Mean responses per session (+/- standard error of the mean, SEM) during nose poke

794 acquisition sessions for all ICSI and CTL mice (top) and separated by ICSI and CTL males and

795 females (bottom).

796

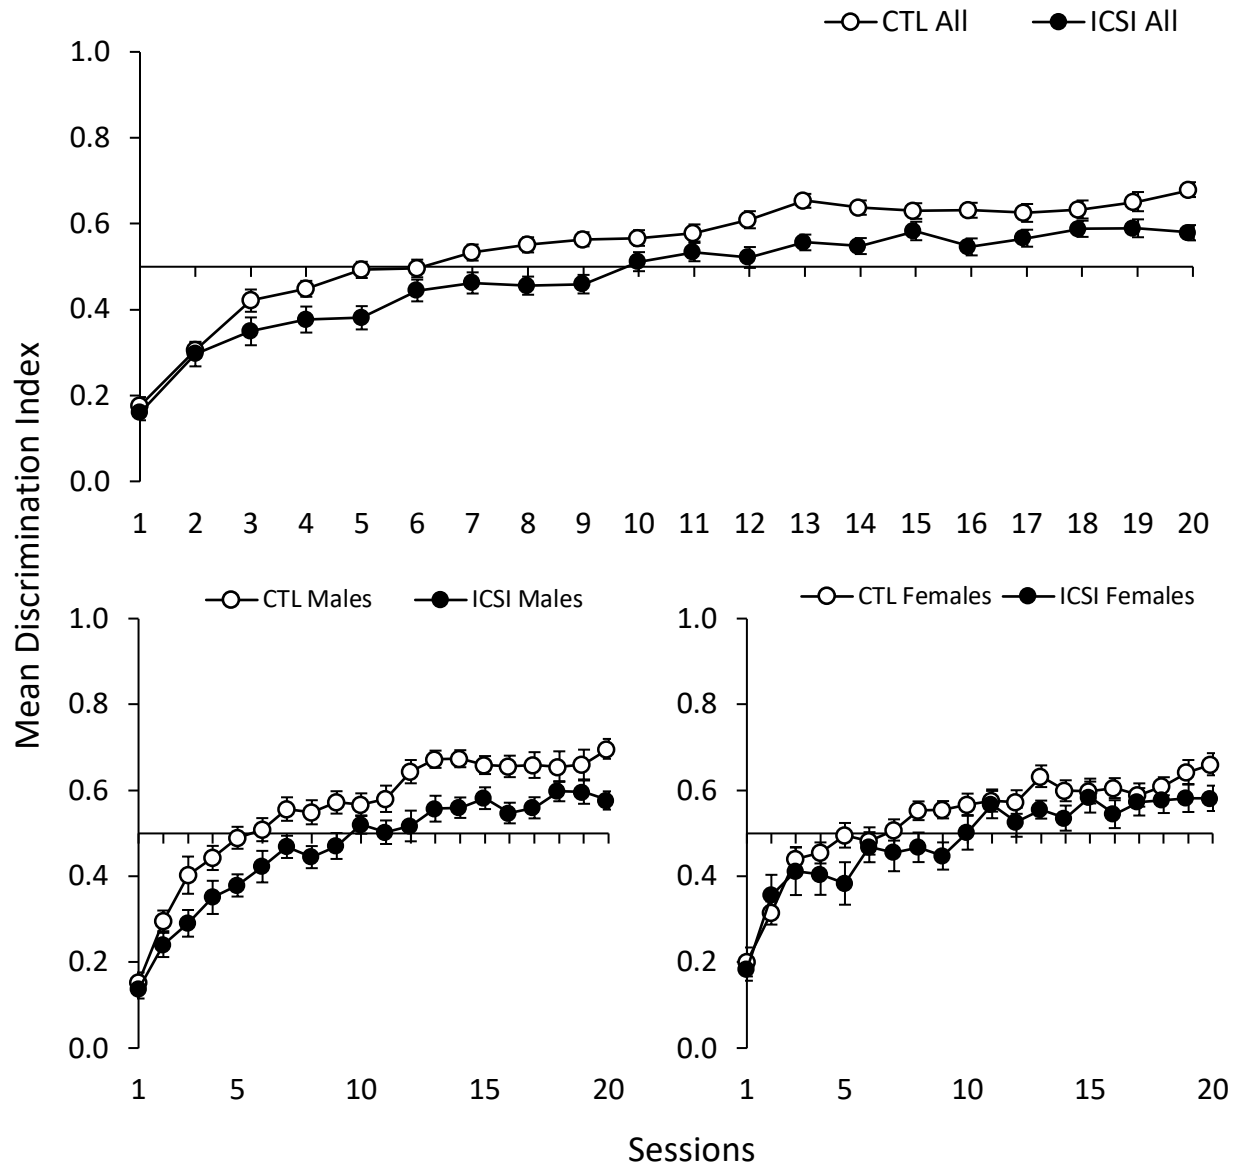

797

798 **Figure 2.** Mean discrimination index scores (+/- SEM) during switching discrimination task

799 (SDT) sessions for all ICSI and CTL mice (top) and separated by ICSI and CTL males and

800 females (bottom).

801

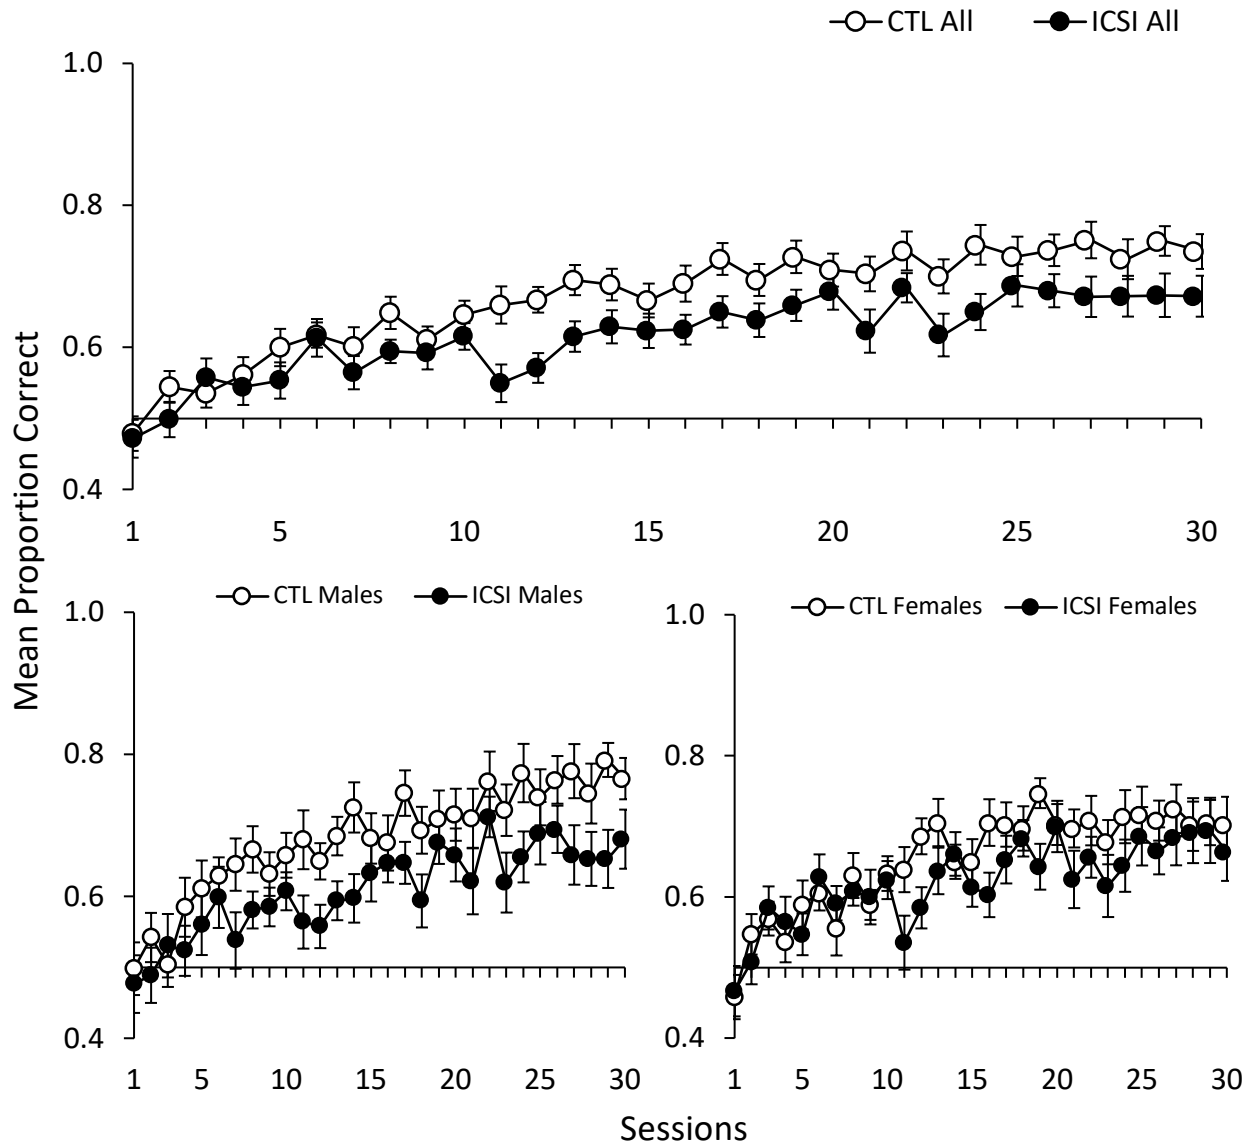

802

803 **Figure 3.** Mean proportion of correct trials (+/- SEM) in delayed-non-matching-to-position

804 (DNMTP) sessions for all ICSI and CTL mice (top) and separated by ICSI and CTL males and

805 females (bottom).

806



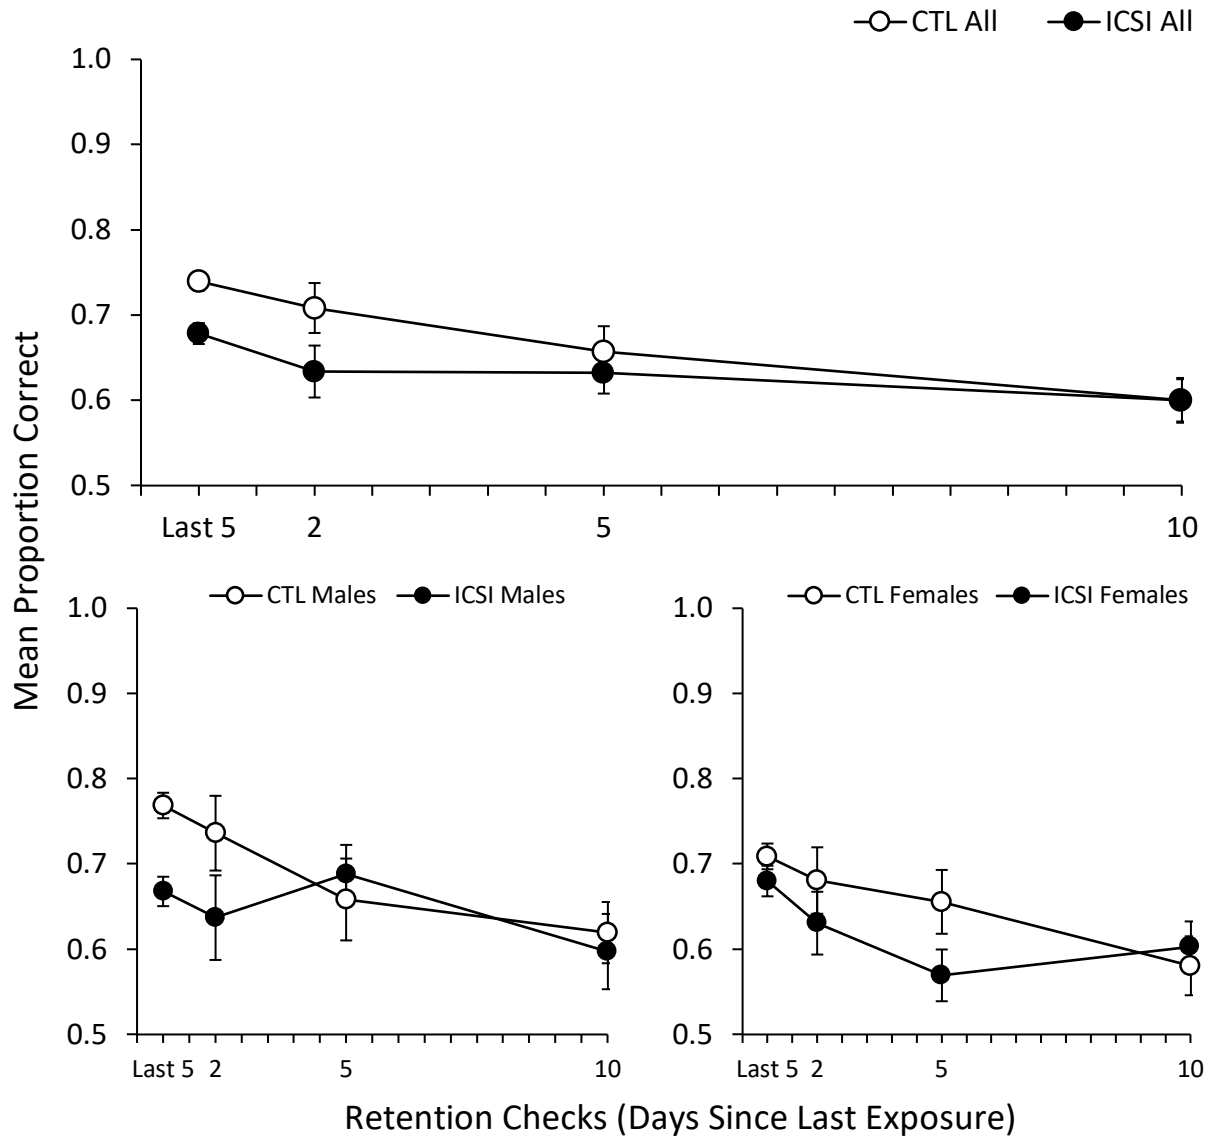

807

808 **Figure 4.** Mean proportion of correct trials (+/- SEM) in DNMTTP retention checks for all ICSI  
809 and CTL mice (top) and separated by ICSI and CTL males and females (bottom). The leftmost  
810 data point represents the mean proportion correct by each group in the last five DNMTTP training  
811 sessions.

812

813

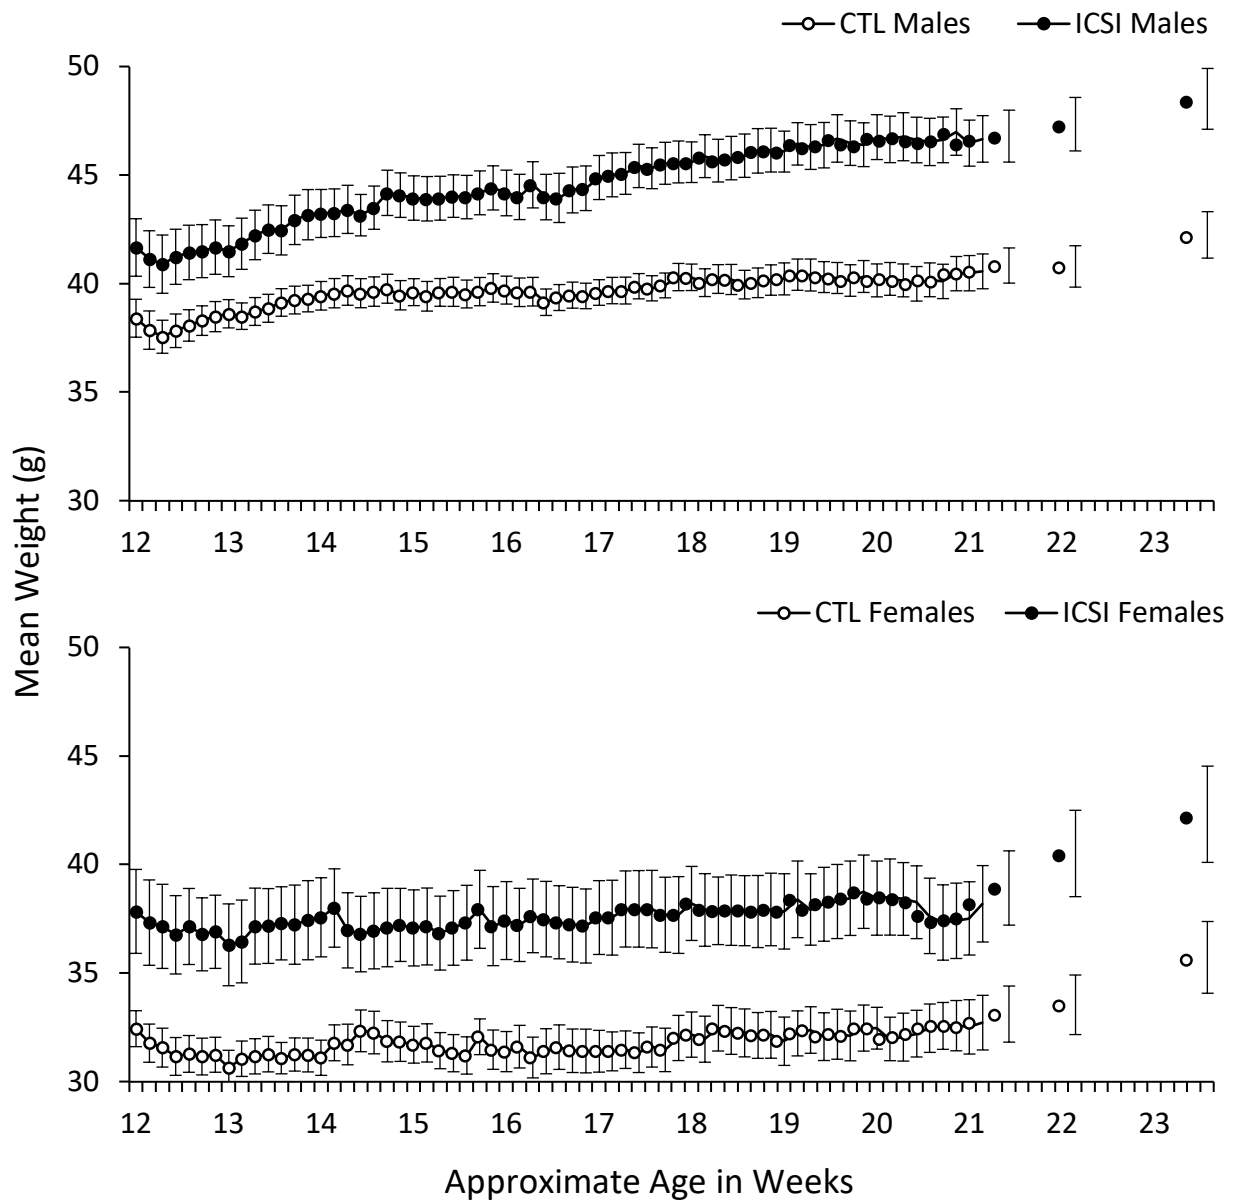

814

815 **Figure 5.** Mean daily weights in grams (+/- SEM) for ICSI and CTL males (top) and females  
816 (bottom) from the first session of magazine training to the final retention check. The x-axis  
817 shows the approximate ages of the mice in weeks. Weights were taken daily prior to sessions  
818 following a 14-h period of food deprivation. The gaps in the data series during weeks 21-23 were  
819 days between retention checks where mice were not weighed and had continuous free access to  
820 food.

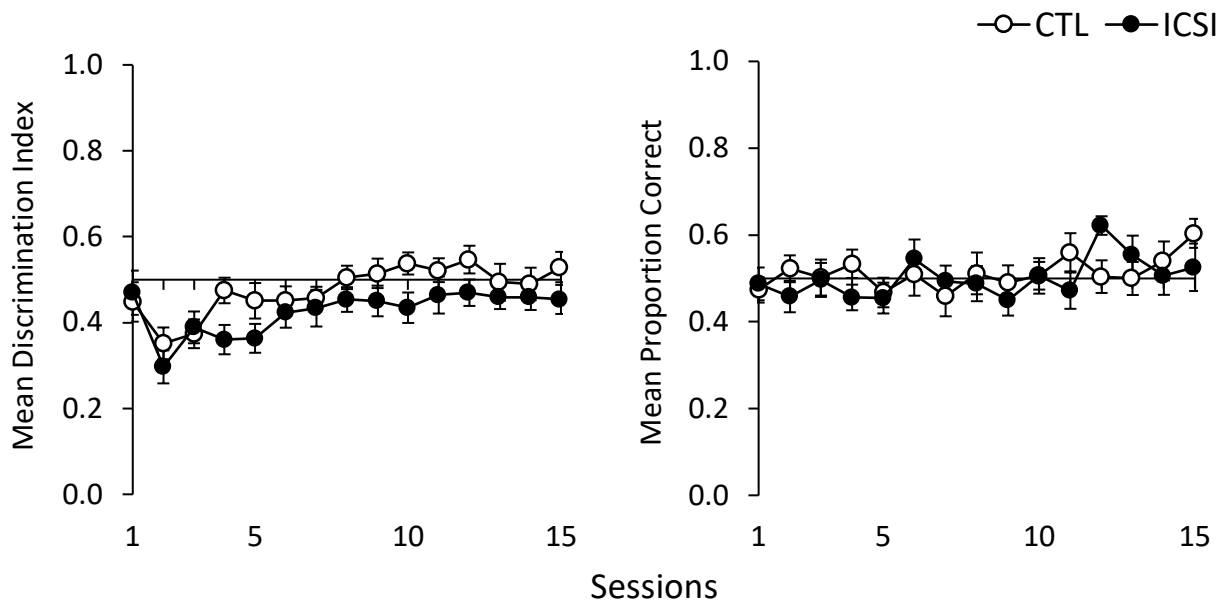

821

822 **Figure 6.** Mean discrimination index during SDT (left) and mean proportion of correct trials

823 during DNMTP (right) follow-up assessments conducted when mice were 52-56 weeks of age.

824 Error bars represent +/- SEM.

825

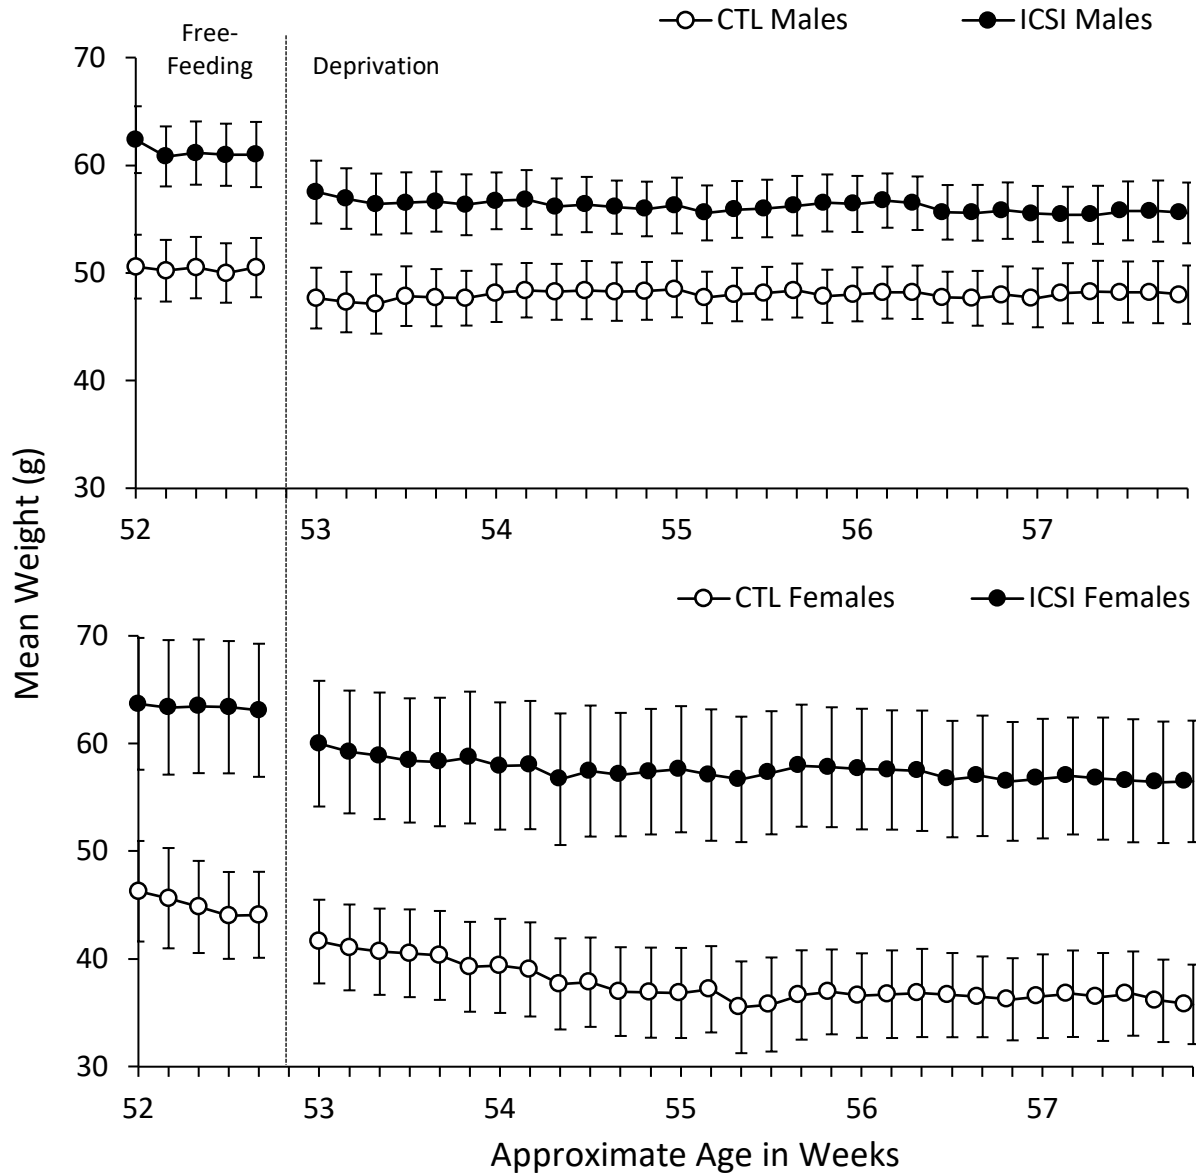

826

827 **Figure 7.** Mean daily weights in grams ( $\pm$  SEM) for ICSI and CTL males (top) and females  
828 (bottom) five days prior to and during the follow-up assessments. Weights to the left of the phase  
829 change line were taken daily while mice had free access to food. Weights to the right of the line  
830 were taken daily prior to sessions following a 14-h period of food deprivation.

831
